# Supplementary material for: Development of a competency model for general practitioners in China by a modified Delphi method
Source: Research Square preprint supplement (doi:10.21203/rs.3.rs-319609/v1), 2021-03-30
Supplement: Supplementary file 1 [file 98fdd961e00109a40aa48a14.docx]

Table 3. Final competencies in the competency model for general practitioners in China

| Domains | Competencies |
| --- | --- |
| 1. Knowledge and skills | 1.1 Be with in-depth knowledge of clinical medicine |
| 1.2 Be with in-depth knowledge of general practice |
| 1.3 Be with in-depth knowledge of public health |
| 1.4 Be with in-depth knowledge of rehabilitation |
| 1.5 Be with in-depth knowledge of psychology and sociology |
| 1.6 Be equipped with the skill of history taking |
| 1.7 Be equipped with the skill of physical examination |
| 1.8 Interpret basic clinical tests and images correctly |
| 1.9 Be equipped with the skill of clinical operation |
| 1.10 Use electronic health record system effectively |
| 1. Patient care | 2.1 Manage diseases at early stage presenting in an undifferentiated way |
| 2.2 Manage simultaneously multiple complaints, both acute and chronic health problems in the individual |
| 2.3 Manage emergency conditions |
| 2.4 Arrange referrals to specialists when necessary |
| 2.5 Ensure patient safety |
| 2.6 Provide advice of rehabilitation when necessary |
| 2.7 Sign contracts with patients and provide continuous service |
| 2.8 Provide home visit and follow-up |
| 2.9 Provide home care when necessary |
| 1. Basic public health services | 3.1 Organize health education |
| 3.2 Provide preventive care by vaccination |
| 3.3 Establish and manage the health files |
| 3.4 Manage the care of special population in the community (elderly, women, children, disabled, patients with mental illness) |
| 3.5 Undertake the continuing management of chronic health problems |
| 3.6 Identify and manage public health emergencies |
| 1. Communication | 4.1 Listen carefully to patients and be empathy |
| 4.2 Explain things clearly and check for patients and families understanding |
| 4.3 Discuss with patients and families about their health condition and thoughts |
| 4.4 Propose treatment plan to patients and families |
| 4.5 Engage patients and families in making decision of therapy plan that reflect the their needs, value and goals |
| 4.6 Communicate effectively with colleagues |
| 4.7 Communicate effectively with stuffs in other institutions |
| 1. Teamwork | 5.1 Collaborate with the members in GP team |
| 5.2 Collaborate with other colleagues |
| 5.3 Collaborate with stuffs in other institutions |
| 5.4 Allocate resources of the institution for optimal patient care |
| 5.5 Demonstrate collaborative leadership in professional practice to enhance health care |
| 5.6 Encourage community personnel and social resources to help with community health services |
| 1. Professionalism | 6.1 Adhere to the medical rules and regulations strictly |
| 6.2 Demonstrate a commitment to patients through clinical excellence and high ethical standards |
| 6.3 Adhere to patients’ right to know |
| 6.4 Adhere to confidentiality and privacy principles |
| 6.5 Have the sense of responsibility |
| 6.6 Self-adjust in the face of challenges |
| 1. Education, learning and research | 7.1 Teach students |
| 7.2 Be engaged in practice-based learning and development |
| 7.3 Be engaged in the continuous enhancement of their professional activities through ongoing learning |
| 7.4 Demonstrate an understanding of the scientific principles of research |
| 7.5 Search, navigate, and evaluate resources and clinical practice guidelines that are relevant to general practice |
| 7.6 Participate in or conduct researches in general practice |
