# Supplementary material for: Development of a competency model for general practitioners in China by a modified Delphi method
Source: Research Square preprint supplement (doi:10.21203/rs.3.rs-319609/v1), 2021-03-30
Supplement: Supplementary file 2 [file e9f9a79a8b36ff51918c7141.docx]

Table 1. Panel characteristics of the Delphi process (n=28)

| Characteristics | Frequency | Percentage (%) |
| --- | --- | --- |
| Gender |  |  |
| Male | 10 | 35.7 |
| Female | 18 | 64.3 |
| Age, years |  |  |
| 30-39 | 4 | 14.3 |
| 40-49 | 15 | 53.6 |
| ≥ 50 | 9 | 32.1 |
| Professional field |  |  |
| GPs in CHSI | 9 | 32.1 |
| GPs in hospital | 11 | 39.3 |
| Professors in medical university | 3 | 10.7 |
| Leader of CHSI | 5 | 17.9 |
| Working years |  |  |
| < 10 | 9 | 32.1 |
| ≥ 10 | 19 | 67.9 |
| Highest degree |  |  |
| Bachelor | 6 | 21.4 |
| Master | 17 | 60.7 |
| PhD | 5 | 17.9 |
| Professional title* |  |  |
| Middle grade title | 4 | 14.3 |
| Associate senior grade title | 6 | 21.4 |
| Senior grade title | 18 | 64.3 |

Abbreviation: GP General practitioner; CHSI Community health service institution

*Note: medical professional titles include junior grade, middle grade, associate senior grade and senior grade titles, which are based upon work experience and research achievement of health professional
